# Supplementary material for: Prognostic Value of Choline and Other Metabolites Measured Using 1H-Magnetic Resonance Spectroscopy in Gliomas: A Meta-Analysis and Systemic Review
Source: MDPI journal article supplement (doi:10.3390/metabo12121219), 2022-12-05
Supplement: s1 [file s1]

**Supplementary Table S1 Quality analysis of selected studies utilizing Newcastle-Ottawa Scale (NOS) for cohort studies**

|                                                                             | Warren<br>et al.<br>(2000) | Tarnawski<br>et al.<br>(2002) | Kuznetsov<br>et al.<br>(2003) | Oh et<br>al.<br>(2004) | Hattingen<br>et al.<br>(2010) | Hipp et<br>al.<br>(2011) | Yamasaki<br>et al.<br>(2011) | Roldan-<br>Valadez et<br>al. (2016) | Nelson<br>et al.<br>(2016) | Durmo<br>et al.<br>(2018) | Gao et<br>al.<br>(2018) | Autry<br>et al.<br>(2022) | Cui et<br>al.<br>(2020) | Tiwari<br>et al.<br>(2020) |
|-----------------------------------------------------------------------------|----------------------------|-------------------------------|-------------------------------|------------------------|-------------------------------|--------------------------|------------------------------|-------------------------------------|----------------------------|---------------------------|-------------------------|---------------------------|-------------------------|----------------------------|
| Selection (0-4)                                                             |                            |                               |                               |                        |                               |                          |                              |                                     |                            |                           |                         |                           |                         |                            |
| 1. Representativeness of the exposed cohort                                 |                            |                               |                               |                        |                               |                          |                              |                                     |                            |                           |                         |                           |                         |                            |
| Truly representative                                                        | ★                          |                               |                               |                        |                               | ★                        | ★                            | ★                                   | ★                          |                           | ★                       | ★                         |                         | ★                          |
| Somewhat representative                                                     |                            | ★                             | ★                             | ★                      | ★                             |                          |                              |                                     |                            | ★                         |                         |                           | ★                       |                            |
| Selected group of users, eg nurses, volunteers                              |                            |                               |                               |                        |                               |                          |                              |                                     |                            |                           |                         |                           |                         |                            |
| No description of the derivation of the cohort                              |                            |                               |                               |                        |                               |                          |                              |                                     |                            |                           |                         |                           |                         |                            |
| 2. Selection of the non-exposed cohort                                      |                            |                               |                               |                        |                               |                          |                              |                                     |                            |                           |                         |                           |                         |                            |
| Drawn from the same community as the exposed cohort                         | ★                          | ★                             | ★                             | ★                      | ★                             | ★                        | ★                            | ★                                   | ★                          | ★                         | ★                       | ★                         | ★                       | ★                          |
| Drawn from a different source                                               |                            |                               |                               |                        |                               |                          |                              |                                     |                            |                           |                         |                           |                         |                            |
| No description of the derivation of the non exposed cohort                  |                            |                               |                               |                        |                               |                          |                              |                                     |                            |                           |                         |                           |                         |                            |
| 3. Ascertainment of exposure                                                |                            |                               |                               |                        |                               |                          |                              |                                     |                            |                           |                         |                           |                         |                            |
| Secure record (eg surgical records)                                         |                            |                               |                               |                        |                               |                          |                              |                                     |                            |                           |                         |                           |                         |                            |
| Structured interview                                                        | ★                          | ★                             | ★                             | ★                      | ★                             | ★                        | ★                            | ★                                   | ★                          | ★                         | ★                       | ★                         | ★                       | ★                          |
| Written self report                                                         |                            |                               |                               |                        |                               |                          |                              |                                     |                            |                           |                         |                           |                         |                            |
| No description                                                              |                            |                               |                               |                        |                               |                          |                              |                                     |                            |                           |                         |                           |                         |                            |
| 4. Demonstration that outcome of interest was not present at start of study |                            |                               |                               |                        |                               |                          |                              |                                     |                            |                           |                         |                           |                         |                            |
| Yes                                                                         | ★                          | ★                             |                               | ★                      |                               | ★                        |                              |                                     | ★                          |                           |                         | ★                         |                         | ★                          |
| No                                                                          |                            |                               | ★                             |                        | ★                             |                          | ★                            | ★                                   |                            | ★                         | ★                       |                           | ★                       |                            |
| Comparability (0-2)                                                         |                            |                               |                               |                        |                               |                          |                              |                                     |                            |                           |                         |                           |                         |                            |
| 1. Comparability of cohorts on the basis of the design or analysis?         |                            |                               |                               |                        |                               |                          |                              |                                     |                            |                           |                         |                           |                         |                            |

|                                                                                                               |   |   |   |   |   |   |   |   |   |   |   |   |   |   |
|---------------------------------------------------------------------------------------------------------------|---|---|---|---|---|---|---|---|---|---|---|---|---|---|
| Study controls for the most important factors                                                                 | ★ | ★ | ★ | ★ | ★ | ★ | ★ | ★ | ★ | ★ | ★ | ★ | ★ | ★ |
| Study controls for any additional factors                                                                     |   | ★ | ★ | ★ | ★ | ★ |   | ★ |   |   | ★ | ★ | ★ |   |
| <b>Outcome (0-3)</b>                                                                                          |   |   |   |   |   |   |   |   |   |   |   |   |   |   |
| <b>1. Assessment of outcome</b>                                                                               |   |   |   |   |   |   |   |   |   |   |   |   |   |   |
| Independent blind assessment                                                                                  | ★ |   |   | ★ |   | ★ |   |   |   |   |   |   |   |   |
| Record linkage                                                                                                |   | ★ | ★ |   | ★ |   | ★ | ★ | ★ | ★ | ★ | ★ | ★ | ★ |
| Self report                                                                                                   |   |   |   |   |   |   |   |   |   |   |   |   |   |   |
| No description                                                                                                |   |   |   |   |   |   |   |   |   |   |   |   |   |   |
| <b>2. Was follow-up long enough for outcomes to occur?</b>                                                    |   |   |   |   |   |   |   |   |   |   |   |   |   |   |
| Yes                                                                                                           | ★ | ★ | ★ | ★ | ★ | ★ | ★ | ★ | ★ | ★ | ★ | ★ | ★ | ★ |
| No                                                                                                            |   |   |   |   |   |   |   |   |   |   |   |   |   |   |
| <b>3. Adequacy of follow up of cohorts</b>                                                                    |   |   |   |   |   |   |   |   |   |   |   |   |   |   |
| Complete follow up: all subjects accounted                                                                    |   |   |   |   |   |   |   |   |   |   |   |   |   |   |
| Subjects lost to follow up unlikely to introduce bias: > 80% follow up, or description provided of those lost | ★ | ★ | ★ |   | ★ | ★ | ★ | ★ | ★ | ★ | ★ | ★ | ★ | ★ |
| Follow up rate < 80% and no description of those lost                                                         |   |   |   | ★ |   |   |   |   |   |   |   |   |   |   |
| No statement                                                                                                  |   |   |   |   |   |   |   |   |   |   |   |   |   |   |
| <b>Total Score</b>                                                                                            | 8 | 9 | 8 | 8 | 8 | 9 | 7 | 8 | 8 | 7 | 8 | 9 | 8 | 8 |
